# Supplementary material for: Ultrasonication Influence on the Morphological Characteristics of Graphene Nanoplatelet Nanocomposites and Their Electrical and Electromagnetic Interference Shielding Behavior
Source: MDPI journal article supplement (doi:10.3390/polym16081068), 2024-04-11
Supplement: s1 [file s1]

# Ultrasonication Influence on the Morphological Characteristics of Graphene Nanoplatelet Nanocomposites and Their Electrical and Electromagnetic Interference Shielding Behavior

Ignacio Collado <sup>1,\*</sup>, Alberto Jiménez-Suárez <sup>1</sup>, Antonio Vázquez-López <sup>1,\*</sup>, Gilberto del Rosario <sup>2</sup> and Silvia G. Prolongo <sup>1,3</sup>

- <sup>1</sup> Materials Science and Engineering Area, Escuela Superior de Ciencias Experimentales y Tecnología, University Rey Juan Carlos, Tulipán Street, 28933 Móstoles, Madrid, Spain; alberto.jimenez.suarez@urjc.es (A.J.-S.); silvia.gonzalez@urjc.es (S.G.P.)
- <sup>2</sup> Technological Support Center, University Rey Juan Carlos, Tulipán Street, 28933 Móstoles, Madrid, Spain; gilberto.delrosario@urjc.es
- <sup>3</sup> Instituto de Tecnologías para la Sostenibilidad, Universidad Rey Juan Carlos, Tulipán Street, 28933 Móstoles, Madrid, Spain
- \* Correspondence: ignacio.collado@urjc.es (I.C.); antonio.vazquez@urjc.es (A.V.-L.)

## Contents

|                                                               |           |
|---------------------------------------------------------------|-----------|
| <b>Graphene Nanoplatelets (GNPs) characterization.....</b>    | <b>2</b>  |
| <b>Transmission Electron Microscopy (TEM) .....</b>           | <b>2</b>  |
| <b>Scanning Electron Microscopy (SEM) .....</b>               | <b>2</b>  |
| <b>Transmission-Scanning Electron Microscopy (STEM) .....</b> | <b>2</b>  |
| <b>Energy Dispersion Spectroscopy (EDS).....</b>              | <b>3</b>  |
| <b>GNPs/epoxy composites Characterization .....</b>           | <b>3</b>  |
| <b>Electrical conductivity .....</b>                          | <b>3</b>  |
| <b>Thermal conductivity .....</b>                             | <b>4</b>  |
| <b>Scanning Electron Microscopy .....</b>                     | <b>4</b>  |
| <b>Graphene lateral size .....</b>                            | <b>6</b>  |
| <b>Transmission optical microscopy (TOM) .....</b>            | <b>7</b>  |
| <b>X-Ray Diffraction (XRD) .....</b>                          | <b>9</b>  |
| <b>Raman spectroscopy .....</b>                               | <b>11</b> |

## Graphene Nanoplatelets (GNPs) characterization

### Transmission Electron Microscopy (TEM)

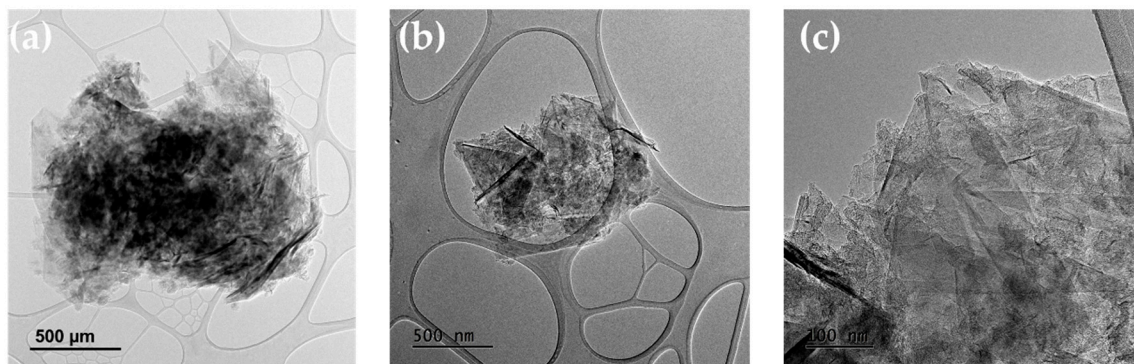

**Figure S1:** TEM micrographs of the GNPs (C300) (a) before and (b)-(c) after sonication 30 min. Note the scale difference.

### Scanning Electron Microscopy (SEM)

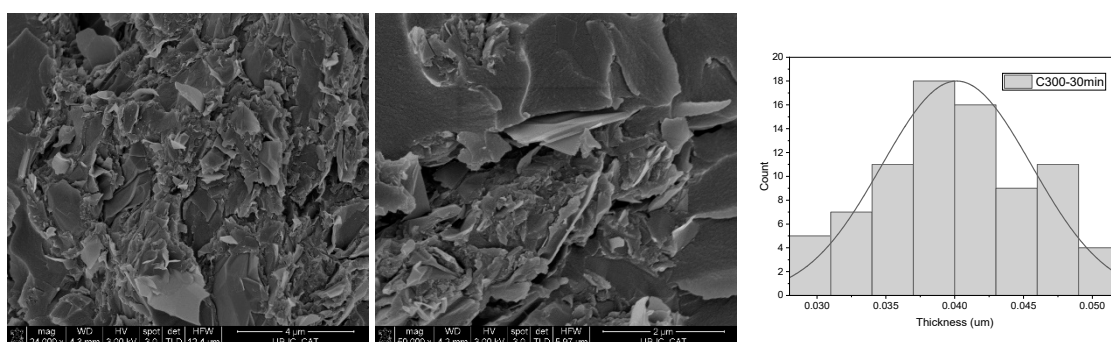

**Figure S2:** SEM micrographs of the GNPs (C300-30min) (a) 24000 x, (b) 50000 x and (c) thickness distribution.

### Transmission-Scanning Electron Microscopy (STEM)

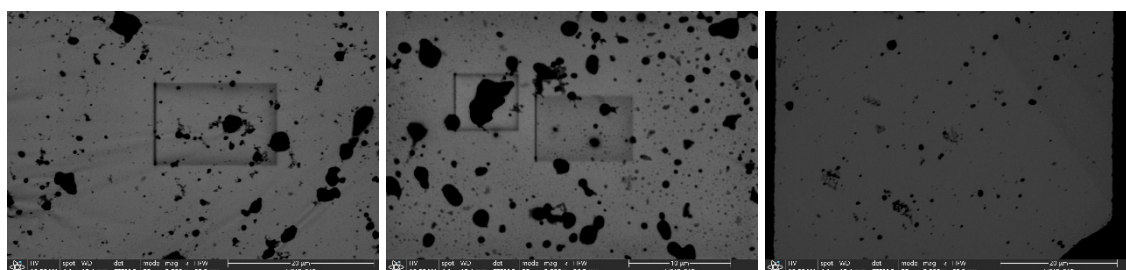

**Figure S3:** STEM micrographs of the pristine GNP (a) C300, (b) C500 and (c) C750.

Energy Dispersion Spectroscopy (EDS)

Table S1. EDS analysis of each for the GNP

| Graphene Nanoplatelet | C (at.%) | O (at.%) | C/O ratio |
|-----------------------|----------|----------|-----------|
| C300                  | 96.4     | 4.85     | 27.0      |
| C500                  | 95.1     | 6.6      | 19.2      |
| C750                  | 93.4     | 8.9      | 14.1      |

GNPs/epoxy composites Characterization

Electrical conductivity

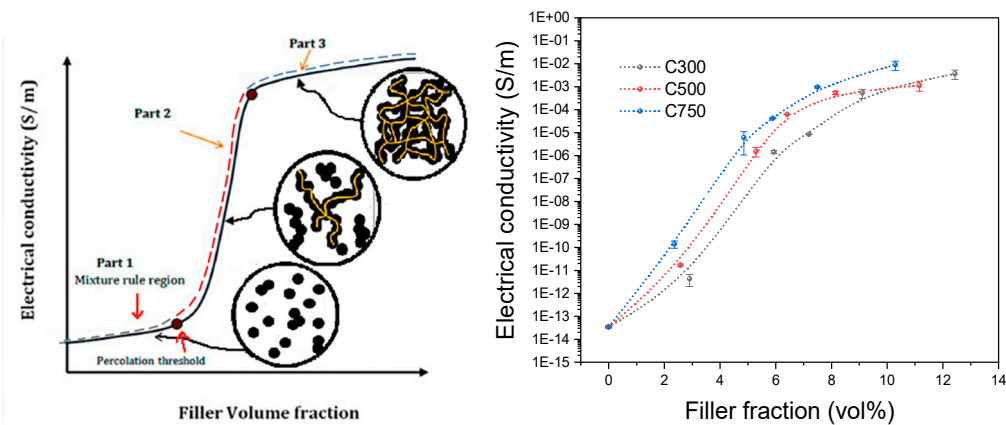

**Figure S4.** (a) Typical percolation threshold in nanocomposites and (b) Percolation threshold obtained for 30 minutes of sonication. The densities used for the calculation of the volume fraction are based on previous reports[1], being 2.33, 2.3 and 2.2 (g/cm<sup>3</sup>) respectively.

## Thermal conductivity

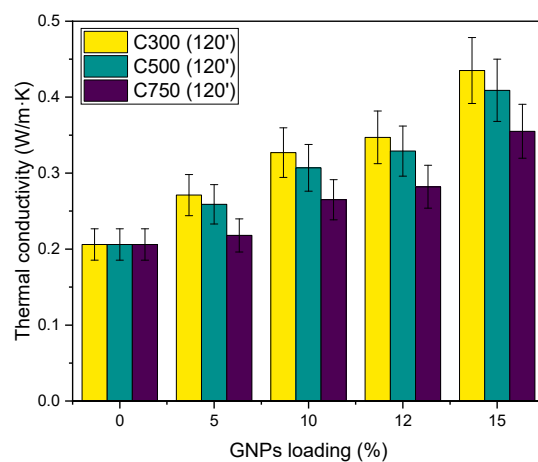

**Figure S5:** Thermal conductivity of GNPs/epoxy composites as a function of loading (from 0 to 15%). Ultrasonication time was set to 120 min in all cases.

## Scanning Electron Microscopy

**Table S2:** Size of sedimentation layers (in  $\mu\text{m}$ ).

| 10% loading GNPs<br>GNPs type/time | C300       | C500       | C750       |
|------------------------------------|------------|------------|------------|
| 30 min                             | 375.2±25.9 | 292.4±12.1 | 293.0±16.1 |
| 60 min                             | 100.4±15.8 | 161.1±9.9  | 128.1±15.4 |
| 120 min                            | 55.7±10.8  | 87.6±11.6  | 77.5±16.5  |
| 12% loading GNPs<br>GNPs type/time |            |            |            |
| 30 min                             | 362.8±9.5  | 365.1±10.1 | 456.8±14.6 |
| 60 min                             | 240.9±18.7 | 240.8±16.8 | 237.6±22.9 |
| 120 min                            | 201.9±18.1 | 157.4±4.5  | 129.0±24.7 |



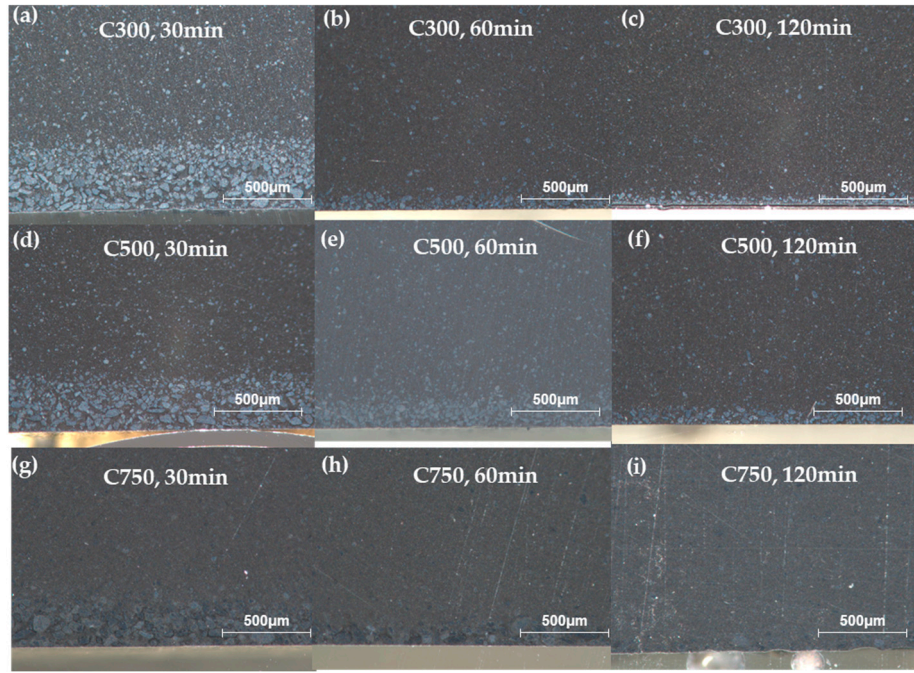

**Figure S6.** Colored panoramic SEM images of samples with 10% loading and variable ultrasonication time of the samples C300 (a), (b) and (c). (d),(e),(f) C500 and (g), (h), (i) to C750 corresponding to ultrasonication times 30, 60 and 120 respectively.

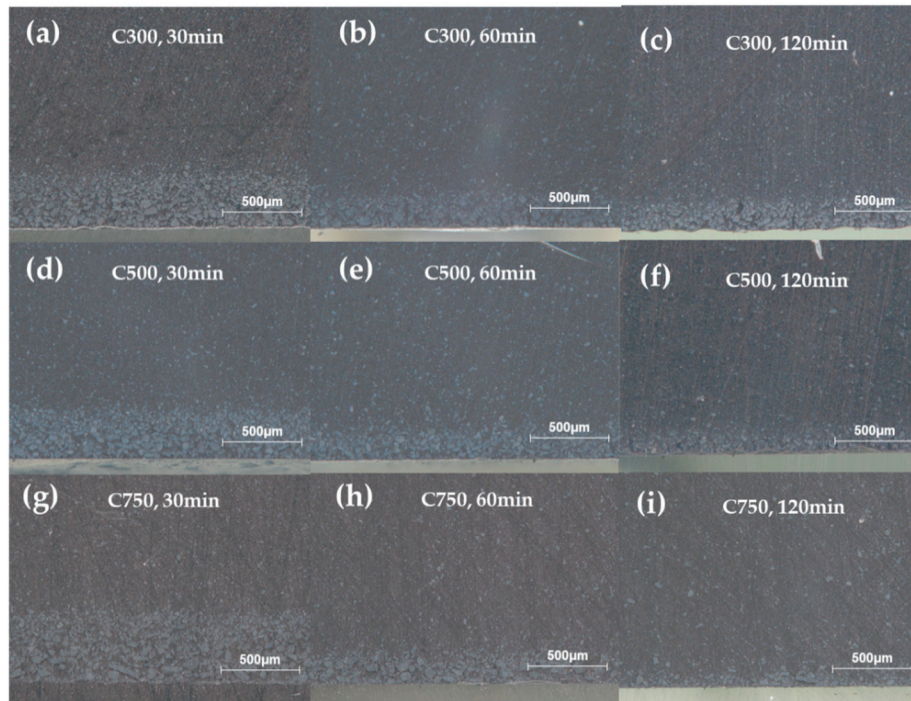

**Figure S7:** Colored panoramic SEM images of samples with 12% loading and variable ultrasonication time of the samples C300 (a), (b) and (c) corresponding to ultrasonication times 30, 60 and 120. (d),(e),(f) C500 and (g), (h), (i) to C750.

**Graphene lateral size**

**Table S3:** Graphene lateral size obtained by SEM (in  $\mu\text{m}$ ).

| Interval size ( $\mu\text{m}$ )<br>(10%)   | C300 |              |      |              |      |              | C500 |              |      |              |      |              | C750 |              |      |              |      |              |
|--------------------------------------------|------|--------------|------|--------------|------|--------------|------|--------------|------|--------------|------|--------------|------|--------------|------|--------------|------|--------------|
|                                            | 30'  |              | 60'  |              | 120' |              | 30'  |              | 60'  |              | 120' |              | 30'  |              | 60'  |              | 120' |              |
|                                            | N    | Fraction (%) |
| 0.25-0.5                                   | 0    | 0.00%        | 5    | 12.0%        | 7    | 19.0%        | 0    | 0.00%        | 4    | 29.2%        | 1    | 20.7%        | 2    | 7.35%        | 7    | 17.6%        | 1    | 74.6%        |
| 0.5-1                                      | 7    | 20.8%        | 2    | 50.7%        | 1    | 45.8%        | 7    | 63.5%        | 7    | 51.0%        | 2    | 48.6%        | 1    | 47.4%        | 2    | 50.5%        | 2    | 18.6%        |
| 1-2                                        | 8    | 50.8%        | 1    | 25.4%        | 1    | 26.7%        | 2    | 21.1%        | 2    | 14.6%        | 8    | 16.5%        | 8    | 31.6%        | 1    | 30.3%        | 9    | 6.72%        |
| 2-3                                        | 1    | 19.1%        | 3    | 8.35%        | 2    | 6.11%        | 1    | 8.47%        | 5    | 3.65%        | 3    | 0.62%        | 2    | 10.6%        | 6    | 1.52%        | 0    | 0.00%        |
| 3-4                                        | 2    | 6.76%        | 1    | 2.64%        | 7    | 1.78%        | 5    | 4.24%        | 1    | 0.73%        | 0    | 0.00%        | 8    | 2.94%        | 0    | 0.00%        | 0    | 0.00%        |
| 4-5                                        | 9    | 2.43%        | 3    | 0.66%        | 2    | 0.51%        | 3    | 2.54%        | 1    | 0.73%        | 0    | 0.00%        | 0    | 0.00%        | 0    | 0.00%        | 0    | 0.00%        |
| Total                                      | 37   | 100%         | 45   | 100%         | 39   | 100%         | 11   | 100%         | 13   | 100%         | 48   | 87%          | 27   | 100%         | 39   | 100%         | 13   | 100%         |
| Average Lateral Size SEM ( $\mu\text{m}$ ) | 1.74 |              | 1.14 |              | 1.05 |              | 1.27 |              | 0.86 |              | 0.71 |              | 1.23 |              | 0.94 |              | 0.52 |              |

**Table S4:** Equivalent graphene lateral size obtained by obtained by extrapolation from the lateral size obtained by Raman.

|                                            | C300  |       |       | C500  |       |       | C750  |       |       |
|--------------------------------------------|-------|-------|-------|-------|-------|-------|-------|-------|-------|
|                                            | 30'   | 60'   | 120'  | 30'   | 60'   | 120'  | 30'   | 60'   | 120'  |
| Lateral size Raman (10%) ( $\mu\text{m}$ ) | 0.490 | 0.423 | 0.429 | 0.309 | 0.297 | 0.285 | 0.303 | 0.260 | 0.223 |
| Lateral size Raman (12%) ( $\mu\text{m}$ ) | 0.545 | 0.471 | 0.492 | 0.464 | 0.377 | 0.431 | 0.250 | 0.275 | 0.228 |
| Proportional constant (12%/10%)            | 1.113 | 1.115 | 1.147 | 1.505 | 1.270 | 1.511 | 0.825 | 0.982 | 1.024 |

|                                                     |       |       |       |       |       |       |       |       |       |
|-----------------------------------------------------|-------|-------|-------|-------|-------|-------|-------|-------|-------|
| SEM lateral size (10%) ( $\mu\text{m}$ )            | 1.744 | 1.139 | 1.054 | 1.269 | 0.861 | 0.707 | 1.227 | 0.938 | 0.521 |
| Equivalent SEM lateral size (12%) ( $\mu\text{m}$ ) | 1.940 | 1.271 | 1.209 | 1.909 | 1.094 | 1.068 | 1.012 | 0.820 | 0.533 |

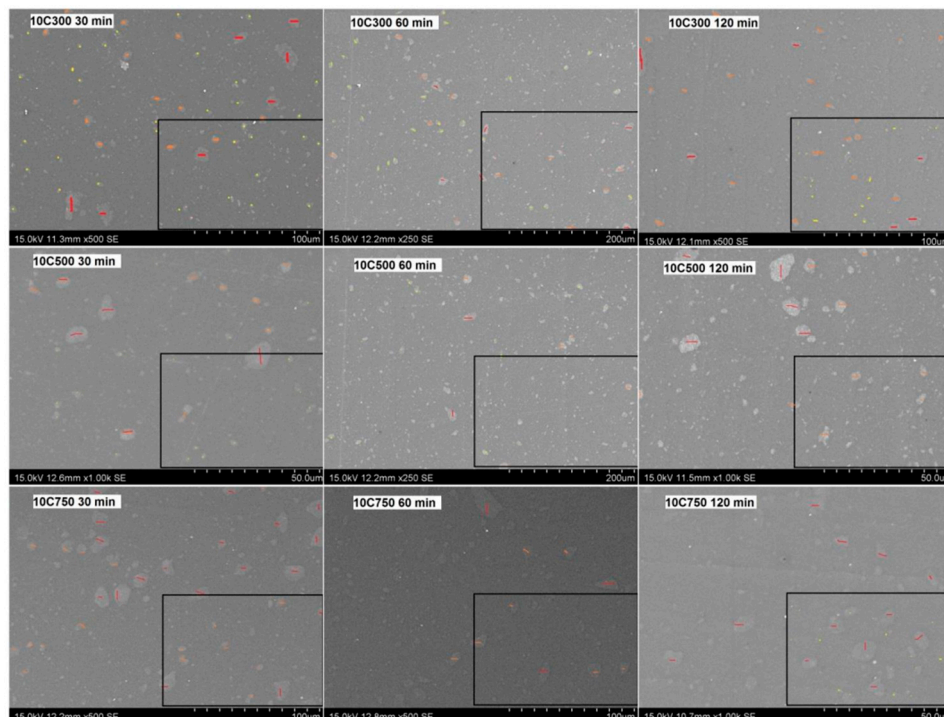

**Figure S8.** SEM images of samples with 10% loading and variable ultrasonication time.

### Transmission optical microscopy (TOM)

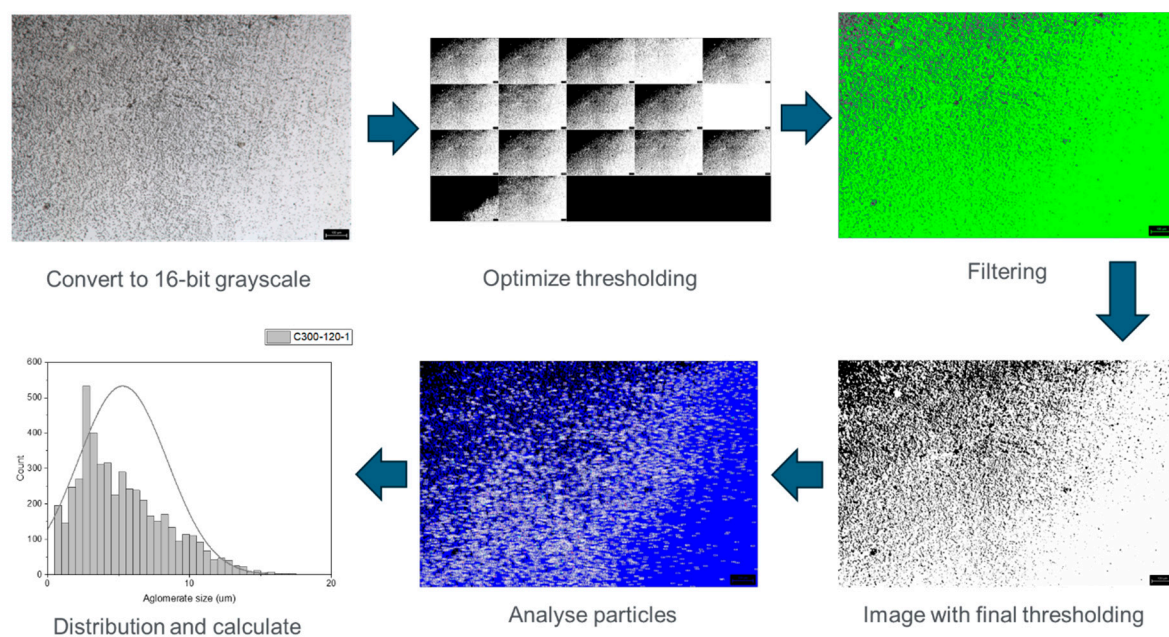

**Figure S9:** Diagram process to determine the agglomeration of GNPs within the GNPs/epoxy composites by Transmission Optical Microscopy (TOM).

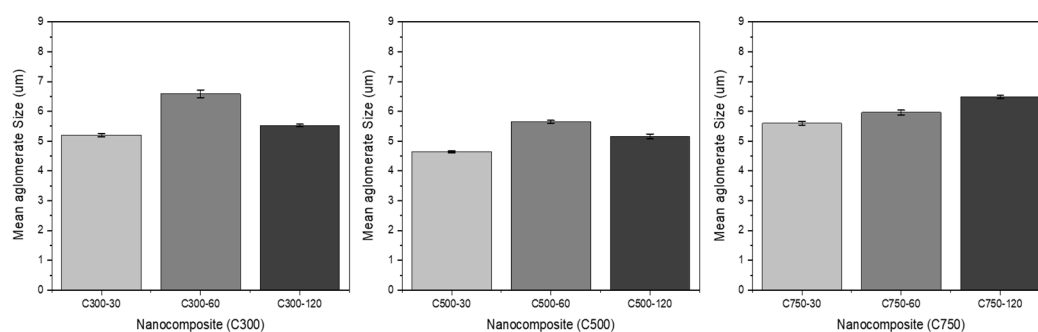

**Figure S10:** Mean average agglomerate size for each nanocomposite (C300, C500 and C750) for each ultrasonication time (30, 60 and 120 min)



## X-Ray Diffraction (XRD)

**Table S5:** Results from the analysis of the crystallite size, lattice strain and number of layers obtained from XRD patterns for each of the 10% GNPs/epoxy composites.

|             |                | $2\theta$ (°) | D (Å) | FWHM (°) | DScherrer (Å) | Lattice Strain (Å) | n (layers) |
|-------------|----------------|---------------|-------|----------|---------------|--------------------|------------|
| <b>C300</b> | <b>0 min</b>   | 26.420        | 3.335 | 0.263    | 373.7         | 772.6              | <b>113</b> |
|             | <b>30 min</b>  | 26.400        | 3.335 | 0.282    | 343.3         | 709.6              | <b>104</b> |
|             | <b>60 min</b>  | 26.400        | 3.335 | 0.291    | 335.0         | 692.6              | <b>101</b> |
|             | <b>120 min</b> | 26.450        | 3.335 | 0.310    | 320.4         | 662.8              | <b>97</b>  |
| <b>C500</b> | <b>0 min</b>   | 26.370        | 3.335 | 0.372    | 259.2         | 535.9              | <b>78</b>  |
|             | <b>30 min</b>  | 26.338        | 3.335 | 0.379    | 251.6         | 520.1              | <b>76</b>  |
|             | <b>60 min</b>  | 26.310        | 3.335 | 0.385    | 245.3         | 507.9              | <b>74</b>  |
|             | <b>120 min</b> | 26.365        | 3.335 | 0.399    | 241.3         | 499.4              | <b>73</b>  |
| <b>C750</b> | <b>0 min</b>   | 26.142        | 3.335 | 1.450    | 61.9          | 128.0              | <b>20</b>  |
|             | <b>30 min</b>  | 26.010        | 3.335 | 1.683    | 51.6          | 106.6              | <b>17</b>  |
|             | <b>60 min</b>  | 26.100        | 3.335 | 1.882    | 47.1          | 97.5               | <b>15</b>  |
|             | <b>120 min</b> | 26.240        | 3.335 | 2.118    | 43.6          | 90.2               | <b>14</b>  |

**Table S6:** Equivalent graphene layer numbers obtained by extrapolation from the  $I_{2D}/I_G$  obtained by Raman.

|                                         | <b>C300</b> |       |       | <b>C500</b> |       |       | <b>C750</b> |       |       |
|-----------------------------------------|-------------|-------|-------|-------------|-------|-------|-------------|-------|-------|
|                                         | 30'         | 60'   | 120'  | 30'         | 60'   | 120'  | 30'         | 60'   | 120'  |
| $I_{2D}/I_G$ Raman (10%)                | 0.356       | 0.355 | 0.362 | 0.355       | 0.367 | 0.373 | 0.267       | 0.272 | 0.296 |
| $I_{2D}/I_G$ Raman (12%)                | 0.248       | 0.269 | 0.288 | 0.356       | 0.388 | 0.385 | 0.246       | 0.257 | 0.273 |
| Proportional constant (10%/12%)         | 1.087       | 0.947 | 0.955 | 0.996       | 0.946 | 0.969 | 1.082       | 1.060 | 1.081 |
| XRD graphene layer numbers (10%)        | 104         | 101   | 97    | 77          | 74    | 73    | 17          | 15    | 14    |
| Equivalent graphene layer numbers (12%) | 107         | 98    | 91    | 77          | 72    | 70    | 18          | 16    | 15    |

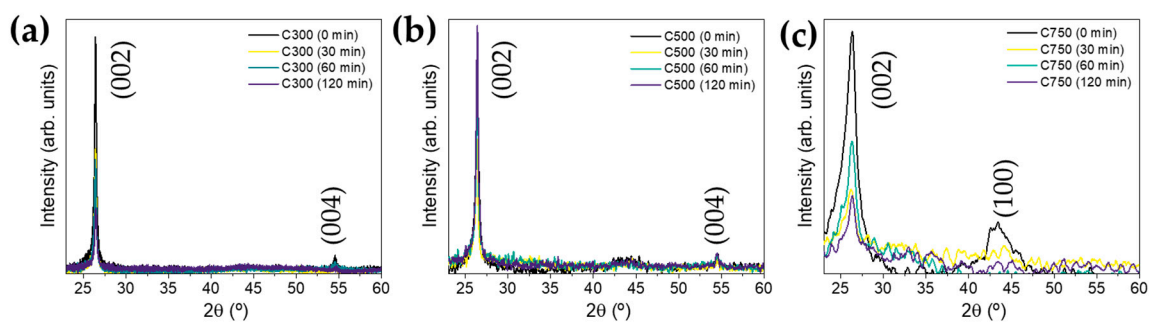

**Figure S11:** XRD diffractograms of the 10% GNPs/epoxy composites (a) C300 (b) C500 and (c) C750 for different ultrasonication times (0, 30, 60 and 120 min) in the range of 24–60°.

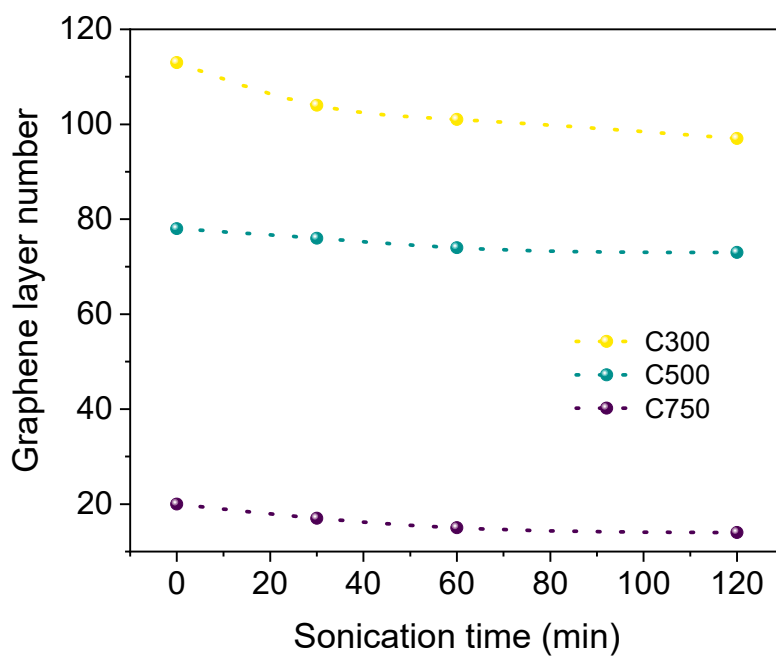

**Figure S12:** Evolution of the number of graphene sheets with sonication time for 10% GNPs loading for C300, C500 and C750 reinforced nanocomposites.

## Raman spectroscopy

**Table S7:** Results from the analysis of the Raman spectra.

|                             | C300                               |                                     |                                  | C500                               |                                     |                                  | C750                               |                                     |                                  |
|-----------------------------|------------------------------------|-------------------------------------|----------------------------------|------------------------------------|-------------------------------------|----------------------------------|------------------------------------|-------------------------------------|----------------------------------|
| <b>12%<br/>load<br/>ing</b> | <b>I<sub>D</sub>/I<sub>G</sub></b> | <b>I<sub>2D</sub>/I<sub>G</sub></b> | <b>L<br/>(<math>\mu</math>m)</b> | <b>I<sub>D</sub>/I<sub>G</sub></b> | <b>I<sub>2D</sub>/I<sub>G</sub></b> | <b>L<br/>(<math>\mu</math>m)</b> | <b>I<sub>D</sub>/I<sub>G</sub></b> | <b>I<sub>2D</sub>/I<sub>G</sub></b> | <b>L<br/>(<math>\mu</math>m)</b> |
| 30'                         | 0.478±<br>0.023                    | 0.249±<br>0.023                     | 0.544±<br>0.021                  | 0.533±<br>0.023                    | 0.354±<br>0.023                     | 0.487±<br>0.021                  | 1.041±<br>0.023                    | 0.247±<br>0.023                     | 0.249±<br>0.021                  |
| 60'                         | 0.547±<br>0.023                    | 0.268±<br>0.023                     | 0.475±<br>0.021                  | 0.687±<br>0.023                    | 0.347±<br>0.023                     | 0.378±<br>0.021                  | 1.018±<br>0.023                    | 0.257±<br>0.023                     | 0.255±<br>0.021                  |
| 120'                        | 0.527±<br>0.023                    | 0.288±<br>0.023                     | 0.493±<br>0.021                  | 0.600±<br>0.023                    | 0.353±<br>0.023                     | 0.433±<br>0.021                  | 1.139±<br>0.023                    | 0.263±<br>0.023                     | 0.228±<br>0.021                  |
| <b>10%<br/>load<br/>ing</b> | <b>I<sub>D</sub>/I<sub>G</sub></b> | <b>I<sub>2D</sub>/I<sub>G</sub></b> | <b>L<br/>(<math>\mu</math>m)</b> | <b>I<sub>D</sub>/I<sub>G</sub></b> | <b>I<sub>2D</sub>/I<sub>G</sub></b> | <b>L<br/>(<math>\mu</math>m)</b> | <b>I<sub>D</sub>/I<sub>G</sub></b> | <b>I<sub>2D</sub>/I<sub>G</sub></b> | <b>L<br/>(<math>\mu</math>m)</b> |
| 30'                         | 0.526±<br>0.023                    | 0.353±<br>0.023                     | 0.494±<br>0.021                  | 0.842±<br>0.023                    | 0.351±<br>0.023                     | 0.308±<br>0.021                  | 0.857±<br>0.023                    | 0.267±<br>0.023                     | 0.303±<br>0.021                  |
| 60'                         | 0.611±<br>0.023                    | 0.353±<br>0.023                     | 0.426±<br>0.021                  | 0.899±<br>0.023                    | 0.367±<br>0.023                     | 0.289±<br>0.021                  | 1.001±<br>0.023                    | 0.273±<br>0.023                     | 0.259±<br>0.021                  |
| 120'                        | 0.594±<br>0.023                    | 0.360±<br>0.023                     | 0.438±<br>0.021                  | 0.877±<br>0.023                    | 0.373±<br>0.023                     | 0.296±<br>0.021                  | 1.168±<br>0.023                    | 0.299±<br>0.023                     | 0.222±<br>0.021                  |

## EMI Shielding

**Table S8:** Comparative table showing the EMI shielding effectiveness as compared with previous reports.

| System                                                        | Reinforcement loading (wt %) | Thickness (mm) | EMI SE (dB)                                               | Ref |
|---------------------------------------------------------------|------------------------------|----------------|-----------------------------------------------------------|-----|
| Carbon black (CB)/epoxy<br>Graphite /epoxy                    | 7% graphite<br>7% CB         | 2              | SE <sub>(G)</sub> of 17 dB<br>SE <sub>(CB)</sub> of 21 dB | [2] |
| Single Walled Nanotubes/Epoxy                                 | 10 wt % SWNTs.               | 1.5            | 10-25 dB at 1GHz                                          | [3] |
| Graphene/epoxy                                                | 10                           | 0.1            | 4.5 dB at 11GHz<br>1 dB in the rest of GHz                | [4] |
| Graphene and molybdenum disulfide nanosheets in Thermoplastic | 0.3%                         | 0.5            | 12 dB                                                     | [5] |

|                    |                  |     |                               |           |
|--------------------|------------------|-----|-------------------------------|-----------|
| polyurethane (TPU) |                  |     |                               |           |
| GNPs/Epoxy         | 10 wt% GNPs      | 5   | 3.87 dB                       | [6]       |
| GNPs/Epoxy         | 17 wt% GNPs      | 2   | 8 dB for 17% loading at 8 GHz | [7]       |
| GNPs/Epoxy         | 15 wt% GNPs C750 | 1.8 | 5.85 dB at 2 GHz              | This work |

## References

1. Dul, S.; Fambri, L.; Merlini, C.; Barra, G.M.O.; Bersani, M.; Vanzetti, L.; Pegoretti, A. Effect of Graphene Nanoplatelets Structure on the Properties of Acrylonitrile–Butadiene–Styrene Composites. *Polym Compos* **2019**, *40*, E285–E300, doi:10.1002/PC.24645.
2. Gümüő, E.; Yağımlı, M.; Arca, E. Investigation of the Dielectric Properties of Graphite and Carbon Black-Filled Composites as Electromagnetic Interference Shielding Coatings. *Applied Sciences* **2023**, *Vol. 13*, Page 8893 **2023**, *13*, 8893, doi:10.3390/APP13158893.
3. Li, N.; Huang, Y.; Du, F.; He, X.; Lin, X.; Gao, H.; Ma, Y.; Li, F.; Chen, Y.; Eklund, P.C. Electromagnetic Interference (EMI) Shielding of Single-Walled Carbon Nanotube Epoxy Composites. *Nano Lett* **2006**, *6*, 1141–1145, doi:10.1021/NL0602589.
4. Bontaő, M.G.; Diacon, A.; Călinescu, I.; Necolau, M.I.; Dinescu, A.; Toader, G.; Ginghină, R.; Vizitiu, A.M.; Velicu, V.; Palade, P.; et al. Epoxy Coatings Containing Modified Graphene for Electromagnetic Shielding. *Polymers* **2022**, *Vol. 14*, Page 2508 **2022**, *14*, 2508, doi:10.3390/POLYM14122508.
5. Khan, R.; Khan, Z.M.; Aqeel, H. Bin; Javed, S.; Shafqat, A.; Qazi, I.; Basit, M.A.; Jan, R. 2D Nanosheets and Composites for EMI Shielding Analysis. *Scientific Reports* **2020** *10*:1 **2020**, *10*, 1–7, doi:10.1038/s41598-020-78614-6.
6. Dong, W.; Zhao, M.; Jin, F.L.; Park, S.J. Enhanced Electrical Conductivity and Electromagnetic Shielding Efficiency of Epoxy Resin Using Graphene Nanoplatelets. *Korean Journal of Chemical Engineering* **2022**, *39*, 1968–1974, doi:10.1007/S11814-021-1007-X.
7. Abdelal, N.; Dib, N.; Young, D.; Slanker, A. Electromagnetic Interference Shielding and Dielectric Properties of Graphene Nanoplatelets/Epoxy Composites in the x-Band Frequency Range. *J Mater Sci* **2022**, *57*, 13928–13944, doi:10.1007/S10853-022-07475-3/.
